# Supplementary material for: A temporal banding approach for consistent taxonomic ranking above the species level
Source: PubMed Central journal article supplement (PMC5442095; doi:10.1038/s41598-017-02477-7), 2017-05-23
Supplement: 41598_2017_2477_MOESM1_ESM.pdf [file 41598_2017_2477_MOESM1_ESM.pdf]

Supplementary Materials for

**A temporal banding approach for consistent taxonomic ranking above the species level**

Ekaphan Kraichak, Ana Crespo, Pradeep K. Divakar, Steven D. Leavitt & H. Thorsten Lumbsch

Comparisons between current and new classification according to a temporal approach.

|                                 | OldFam       | NewFam | OldGen                | NewGen |
|---------------------------------|--------------|--------|-----------------------|--------|
| Ahtiana_pallidula               | Parmeliaceae |        | 1 Ahtiana             | 1      |
| Allocetraria_ambigua            | Parmeliaceae |        | 1 Allocetraria        | 1      |
| Allocetraria_flavonigrescens    | Parmeliaceae |        | 1 Allocetraria        | 1      |
| Allocetraria_globulans          | Parmeliaceae |        | 1 Allocetraria        | 1      |
| Allocetraria_stracheyi_AST_02   | Parmeliaceae |        | 1 Allocetraria        | 1      |
| Arctocetraria_andrejewii        | Parmeliaceae |        | 1 Arctocetraria       | 1      |
| Arctocetraria_nigriscens        | Parmeliaceae |        | 1 Arctocetraria       | 1      |
| Cetraria_islandica              | Parmeliaceae |        | 1 Cetraria            | 1      |
| Cetraria_laevigata              | Parmeliaceae |        | 1 Cetraria            | 1      |
| Cetraria_muricata               | Parmeliaceae |        | 1 Cetraria            | 1      |
| Cetraria_nigricans              | Parmeliaceae |        | 1 Cetraria            | 1      |
| Cetraria_odontella              | Parmeliaceae |        | 1 Cetraria            | 1      |
| Cetraria_sepincola_CSE_01       | Parmeliaceae |        | 1 Cetraria            | 1      |
| Cetrariella_delisei             | Parmeliaceae |        | 1 Cetrariella         | 1      |
| Cetrariella_fastigiata          | Parmeliaceae |        | 1 Cetrariella         | 1      |
| Cetrariella_fastigiata_CFA_02   | Parmeliaceae |        | 1 Cetrariella         | 1      |
| Cetrellopsis_rhytidocarpa       | Parmeliaceae |        | 1 Cetrellopsis        | 1      |
| Flavocetraria_cucullata         | Parmeliaceae |        | 1 Flavocetraria       | 1      |
| Flavocetraria_nivalis           | Parmeliaceae |        | 1 Flavocetrariella    | 1      |
| Kaernefeltia_merrillii          | Parmeliaceae |        | 1 Kaernefeltia        | 1      |
| Masonhalea_inermis_551a         | Parmeliaceae |        | 1 Masonhalea          | 1      |
| Masonhalea_richardsonii         | Parmeliaceae |        | 1 Masonhalea          | 1      |
| Melanelia_commixta              | Parmeliaceae |        | 1 Melanelicetraria    | 1      |
| Melanelia_sorediella            | Parmeliaceae |        | 1 Melanelicetraria    | 1      |
| Melanelia_culbersonii_3992      | Parmeliaceae |        | 1 Melaneliculbersonia | 1      |
| Cetraria_obtusata               | Parmeliaceae |        | 1 Neocetraria         | 1      |
| Nephromopsis_komarovii          | Parmeliaceae |        | 1 Nephromopsis        | 1      |
| Nephromopsis_laureri            | Parmeliaceae |        | 1 Nephromopsis        | 1      |
| Nephromopsis_leucostigma        | Parmeliaceae |        | 1 Nephromopsis        | 1      |
| Nephromopsis_nephromoides       | Parmeliaceae |        | 1 Nephromopsis        | 1      |
| Nephromopsis_pallescens         | Parmeliaceae |        | 1 Nephromopsis        | 1      |
| Tuckermanella_coralligera       | Parmeliaceae |        | 1 Tuckermanella       | 1      |
| Tuckermanella_fendleri          | Parmeliaceae |        | 1 Tuckermanella       | 1      |
| Tuckermannopsis_chlorophylla    | Parmeliaceae |        | 1 Tuckermannopsis     | 1      |
| Tuckermannopsis_ciliaris        | Parmeliaceae |        | 1 Tuckermannopsis     | 1      |
| Tuckermannopsis_orbata          | Parmeliaceae |        | 1 Tuckermannopsis     | 1      |
| Usnocetraria_oakesiana          | Parmeliaceae |        | 1 Usnocetraria        | 1      |
| Vulpicida_canadensis_CAN_15     | Parmeliaceae |        | 1 Vulpicida           | 1      |
| Vulpicida_juniperinus_JUN_07    | Parmeliaceae |        | 1 Vulpicida           | 1      |
| Vulpicida_pinastri              | Parmeliaceae |        | 1 Vulpicida           | 1      |
| Vulpicida_tubulosus_JUN_14      | Parmeliaceae |        | 1 Vulpicida           | 1      |
| Vulpicida_viridis_VIR_10        | Parmeliaceae |        | 1 Vulpicida           | 1      |
| Alectoria_arctica_S146          | Parmeliaceae |        | 1 Alectoria           | 2      |
| Alectoria_nigricans             | Parmeliaceae |        | 1 Alectoria           | 2      |
| Alectoria_ochroleuca            | Parmeliaceae |        | 1 Alectoria           | 2      |
| Alectoria_sarmentosa            | Parmeliaceae |        | 1 Alectoria           | 2      |
| Allantoparmelia_almquistii_5158 | Parmeliaceae |        | 1 Allantoparmelia     | 3      |
| Allantoparmelia_alpicola        | Parmeliaceae |        | 1 Allantoparmelia     | 3      |
| Anzia_colpodes                  | Parmeliaceae |        | 1 Anzia               | 4      |
| Anzia_flavotenuis               | Parmeliaceae |        | 1 Anzia               | 5      |
| Anzia_mahaeliyensis             | Parmeliaceae |        | 1 Anzia               | 5      |
| Arctoparmelia_centrifuga        | Parmeliaceae |        | 1 Arctoparmelia       | 6      |
| Arctoparmelia_incurva_MWE10     | Parmeliaceae |        | 1 Arctoparmelia       | 6      |
| Austroparmelina_endoleuca2      | Parmeliaceae |        | 1 Austroparmelina     | 7      |
| Austroparmelina_macrospora      | Parmeliaceae |        | 1 Austroparmelina     | 7      |
| Austroparmelina_pruinata        | Parmeliaceae |        | 1 Austroparmelina     | 7      |
| Austroparmelina_pseudorelicina  | Parmeliaceae |        | 1 Austroparmelina     | 7      |
| Brodoa_atrofusca                | Parmeliaceae |        | 1 Brodoa              | 8      |

|                                  |              |   |                |    |
|----------------------------------|--------------|---|----------------|----|
| Brodoa_intestiniformis           | Parmeliaceae | 1 | Brodoa         | 8  |
| Brodoa_oroarctica                | Parmeliaceae | 1 | Brodoa         | 8  |
| Hypogymnia_bitteri30678          | Parmeliaceae | 1 | Hypogymnia     | 8  |
| Hypogymnia_hultenii2             | Parmeliaceae | 1 | Hypogymnia     | 8  |
| Hypogymnia_imshaugii1            | Parmeliaceae | 1 | Hypogymnia     | 8  |
| Hypogymnia_imshaugii2            | Parmeliaceae | 1 | Hypogymnia     | 8  |
| Hypogymnia_lophyrea2             | Parmeliaceae | 1 | Hypogymnia     | 8  |
| Hypogymnia_lugubris3014          | Parmeliaceae | 1 | Hypogymnia     | 8  |
| Hypogymnia_mollisD79             | Parmeliaceae | 1 | Hypogymnia     | 8  |
| Hypogymnia_mundata3013           | Parmeliaceae | 1 | Hypogymnia     | 8  |
| Hypogymnia_physodes              | Parmeliaceae | 1 | Hypogymnia     | 8  |
| Hypogymnia_pulverata_2277        | Parmeliaceae | 1 | Hypogymnia     | 8  |
| Hypogymnia_pulverata_2281        | Parmeliaceae | 1 | Hypogymnia     | 8  |
| Hypogymnia_rugosa3822            | Parmeliaceae | 1 | Hypogymnia     | 8  |
| Hypogymnia_subphysodes_2280      | Parmeliaceae | 1 | Hypogymnia     | 8  |
| Hypogymnia_tasmanica3012         | Parmeliaceae | 1 | Hypogymnia     | 8  |
| Hypogymnia_vittata               | Parmeliaceae | 1 | Hypogymnia     | 8  |
| Pseudevernia_consocians          | Parmeliaceae | 1 | Pseudevernia   | 8  |
| Pseudevernia_furfuracea          | Parmeliaceae | 1 | Pseudevernia   | 8  |
| Bryocaulon_divergens_MWE158      | Parmeliaceae | 1 | Bryocaulon     | 9  |
| Bryocaulon_pseudosatoanum_YO8239 | Parmeliaceae | 1 | Bryocaulon     | 9  |
| Bryocaulon_satoanumMWE163        | Parmeliaceae | 1 | Bryocaulon     | 9  |
| Bryoria_americana_S329           | Parmeliaceae | 1 | Bryoria        | 10 |
| Bryoria_bicolor_L156             | Parmeliaceae | 1 | Bryoria        | 10 |
| Bryoria_capillaris               | Parmeliaceae | 1 | Bryoria        | 10 |
| Bryoria_fremontii                | Parmeliaceae | 1 | Bryoria        | 10 |
| Bryoria_furcellata_L147          | Parmeliaceae | 1 | Bryoria        | 10 |
| Bryoria_fuscescens_S56           | Parmeliaceae | 1 | Bryoria        | 10 |
| Bryoria_glabra_L186              | Parmeliaceae | 1 | Bryoria        | 10 |
| Bryoria_implexa_L244a            | Parmeliaceae | 1 | Bryoria        | 10 |
| Bryoria_nadvornikiana_S79        | Parmeliaceae | 1 | Bryoria        | 10 |
| Bryoria_simplicior_S30b          | Parmeliaceae | 1 | Bryoria        | 10 |
| Bryoria_smithii_S65              | Parmeliaceae | 1 | Bryoria        | 10 |
| Bryoria_trichodes                | Parmeliaceae | 1 | Bryoria        | 10 |
| Bulbothrix_apophysata            | Parmeliaceae | 1 | Bulbothricella | 11 |
| Bulbothrix_coronata              | Parmeliaceae | 1 | Bulbothricella | 11 |
| Bulbothrix_decurtata             | Parmeliaceae | 1 | Bulbothrix     | 12 |
| Bulbothrix_isidiza1              | Parmeliaceae | 1 | Bulbothrix     | 12 |
| Bulbothrix_isidiza2              | Parmeliaceae | 1 | Bulbothrix     | 12 |
| Bulbothrix_meizospora            | Parmeliaceae | 1 | Bulbothrix     | 12 |
| Bulbothrix_meizospora2           | Parmeliaceae | 1 | Bulbothrix     | 12 |
| Bulbothrix_sensibilis            | Parmeliaceae | 1 | Bulbothrix     | 12 |
| Bulbothrix_setschwanensis        | Parmeliaceae | 1 | Bulbothrix     | 12 |
| Bulbothrix_tabacina              | Parmeliaceae | 1 | Bulbothrix     | 12 |
| Canoparmelia_carneopruinata      | Parmeliaceae | 1 | Crespoa        | 13 |
| Nesolechia_oxyspora_16840        | Parmeliaceae | 1 | Nesolechia     | 13 |
| Punctelia_aff_bolliana           | Parmeliaceae | 1 | Punctelia      | 13 |
| Punctelia_borreri2               | Parmeliaceae | 1 | Punctelia      | 13 |
| Punctelia_pseudocoralloidea      | Parmeliaceae | 1 | Punctelia      | 13 |
| Punctelia_reddenda               | Parmeliaceae | 1 | Punctelia      | 13 |
| Punctelia_rudecta                | Parmeliaceae | 1 | Punctelia      | 13 |
| Punctelia_subflava               | Parmeliaceae | 1 | Punctelia      | 13 |
| Punctelia_subrudecta3            | Parmeliaceae | 1 | Punctelia      | 13 |
| Punctelia_ullophylla             | Parmeliaceae | 1 | Punctelia      | 13 |
| Canoparmelia_caroliniana         | Parmeliaceae | 1 | Canoparmelia   | 14 |
| Canoparmelia_nairobiensis        | Parmeliaceae | 1 | Canoparmelia   | 14 |
| Canoparmelia_inhaminensis        | Parmeliaceae | 1 | Crespoa        | 14 |
| Canoparmelia_schelppei           | Parmeliaceae | 1 | Crespoa        | 14 |
| Canoparmelia_concrescens         | Parmeliaceae | 1 | Canoparmelia   | 15 |

|                                 |              |   |                |    |
|---------------------------------|--------------|---|----------------|----|
| Canoparmelia_texana             | Parmeliaceae | 1 | Canoparmelia   | 15 |
| Canoparmelia_crozalsiana        | Parmeliaceae | 1 | Crespoa        | 15 |
| Canoparmelia_Punctelia_sp       | Parmeliaceae | 1 | Newgenus       | 15 |
| Cetrelia_cetrarioides           | Parmeliaceae | 1 | Cetrelia       | 16 |
| Cetrelia_olivetorum             | Parmeliaceae | 1 | Cetrelia       | 16 |
| Cetrelia_pseudolivetorum        | Parmeliaceae | 1 | Cetrelia       | 16 |
| Coelopogon_abraxus_4253         | Parmeliaceae | 1 | Coelopogon     | 20 |
| Coelopogon_epiphorellus_4254    | Parmeliaceae | 1 | Coelopogon     | 20 |
| Coelopogon_epiphorellus_MWE156  | Parmeliaceae | 1 | Coelopogon     | 20 |
| Cornicularia_normoerica         | Parmeliaceae | 1 | Cornicularia   | 21 |
| Dactylina_arctica_4855          | Parmeliaceae | 1 | Dactylina      | 22 |
| Dactylina_ramulosa_4902         | Parmeliaceae | 1 | Dactylina      | 22 |
| Emodomelanelia_masonii          | Parmeliaceae | 1 | Emodomelanelia | 23 |
| Esslingeriana_idahoensis_4823   | Parmeliaceae | 1 | Esslingeriana  | 24 |
| Melanelia_hepatizon             | Parmeliaceae | 1 | Melanelia      | 24 |
| Melanelia_stygia                | Parmeliaceae | 1 | Melanelia      | 24 |
| Evernia_divaricata              | Parmeliaceae | 1 | Evernia        | 25 |
| Evernia_mesomorpha              | Parmeliaceae | 1 | Evernia        | 25 |
| Evernia_prunastri               | Parmeliaceae | 1 | Evernia        | 25 |
| Everniopsis_trulla              | Parmeliaceae | 1 | Everniopsis    | 26 |
| Everniopsis_trulla_5706         | Parmeliaceae | 1 | Everniopsis    | 26 |
| Flavoparmelia_baltimorensis     | Parmeliaceae | 1 | Flavoparmelia  | 27 |
| Flavoparmelia_caperata2         | Parmeliaceae | 1 | Flavoparmelia  | 27 |
| Flavoparmelia_haysomii          | Parmeliaceae | 1 | Flavoparmelia  | 27 |
| Flavoparmelia_marchantii        | Parmeliaceae | 1 | Flavoparmelia  | 27 |
| Flavoparmelia_soredians2        | Parmeliaceae | 1 | Flavoparmelia  | 27 |
| Flavoparmelia_springtonensis    | Parmeliaceae | 1 | Flavoparmelia  | 27 |
| Flavoparmelia_subambigua        | Parmeliaceae | 1 | Flavoparmelia  | 27 |
| Flavoparmelia_citrinescens      | Parmeliaceae | 1 | Flavoparmelia  | 28 |
| Flavopunctelia_flaventior       | Parmeliaceae | 1 | Flavopunctelia | 29 |
| Flavopunctelia_soredica         | Parmeliaceae | 1 | Flavopunctelia | 29 |
| Hypotrachyna_cirrhatta          | Parmeliaceae | 1 | Hypotrachyna   | 31 |
| Hypotrachyna_dubitans           | Parmeliaceae | 1 | Hypotrachyna   | 31 |
| Hypotrachyna_kaernefeltii       | Parmeliaceae | 1 | Hypotrachyna   | 31 |
| Hypotrachyna_lipidifera         | Parmeliaceae | 1 | Hypotrachyna   | 31 |
| Hypotrachyna_nepalensis         | Parmeliaceae | 1 | Hypotrachyna   | 31 |
| Hypotrachyna_sorocheila         | Parmeliaceae | 1 | Hypotrachyna   | 31 |
| Hypotrachyna_endochloraMAF10379 | Parmeliaceae | 1 | Hypotrachyna   | 32 |
| Hypotrachyna_imbricatula        | Parmeliaceae | 1 | Hypotrachyna   | 32 |
| Hypotrachyna_physcioides1       | Parmeliaceae | 1 | Hypotrachyna   | 32 |
| Hypotrachyna_neodissecta2       | Parmeliaceae | 1 | Hypotrachyna   | 33 |
| Hypotrachyna_polydactyla        | Parmeliaceae | 1 | Hypotrachyna   | 33 |
| Hypotrachyna_pseudosinuosa      | Parmeliaceae | 1 | Hypotrachyna   | 33 |
| Hypotrachyna_revoluta           | Parmeliaceae | 1 | Hypotrachyna   | 33 |
| Parmelinopsis_afrorevoluta      | Parmeliaceae | 1 | Hypotrachyna   | 33 |
| Parmelinopsis_horrescens2       | Parmeliaceae | 1 | Hypotrachyna   | 33 |
| Parmelinopsis_minarum           | Parmeliaceae | 1 | Hypotrachyna   | 33 |
| Parmelinopsis_neodamaziana      | Parmeliaceae | 1 | Hypotrachyna   | 33 |
| Parmelinopsis_subfaticens       | Parmeliaceae | 1 | Hypotrachyna   | 33 |
| Hypotrachyna_sinuosa            | Parmeliaceae | 1 | Hypotrachyna   | 34 |
| Imshaugia_aleurites             | Parmeliaceae | 1 | Imshaugia      | 35 |
| Letharia_columbiana             | Parmeliaceae | 1 | Letharia       | 50 |
| Lethariella_cashmeriana         | Parmeliaceae | 1 | Letharia       | 50 |
| Lethariella_togashii_YO6735     | Parmeliaceae | 1 | Lethariella    | 51 |
| Melanelixia_albertana           | Parmeliaceae | 1 | Melanelixia    | 52 |
| Melanelixia_californica1        | Parmeliaceae | 1 | Melanelixia    | 52 |
| Melanelixia_californica3        | Parmeliaceae | 1 | Melanelixia    | 52 |
| Melanelixia_glabra1             | Parmeliaceae | 1 | Melanelixia    | 52 |
| Melanelixia_subargentifera2     | Parmeliaceae | 1 | Melanelixia    | 52 |

|                                     |              |   |                 |    |
|-------------------------------------|--------------|---|-----------------|----|
| Melanelixia_villosella2             | Parmeliaceae | 1 | Melanelixia     | 52 |
| Melanelixia_fuliginosa              | Parmeliaceae | 1 | Melanelixia     | 53 |
| Melanelixia_subaurifera3            | Parmeliaceae | 1 | Melanelixia     | 53 |
| Melanelixia_glabratuloides          | Parmeliaceae | 1 | Melanelixia     | 54 |
| Melanelixia_pilliferella            | Parmeliaceae | 1 | Melanelixia     | 54 |
| Melanelixia_subglabra               | Parmeliaceae | 1 | Melanelixia     | 55 |
| Melanohalea_aff_exasperata3         | Parmeliaceae | 1 | Melanohalea     | 56 |
| Melanohalea_elegantula_SD           | Parmeliaceae | 1 | Melanohalea     | 56 |
| Melanohalea_exasperata_SD           | Parmeliaceae | 1 | Melanohalea     | 56 |
| Melanohalea_exasperata2             | Parmeliaceae | 1 | Melanohalea     | 56 |
| Melanohalea_exasperatula_SD         | Parmeliaceae | 1 | Melanohalea     | 56 |
| Melanohalea_laciniatula3            | Parmeliaceae | 1 | Melanohalea     | 56 |
| Melanohalea_laciniatula4            | Parmeliaceae | 1 | Melanohalea     | 56 |
| Melanohalea_multispora_SD           | Parmeliaceae | 1 | Melanohalea     | 56 |
| Melanohalea_subolivacea_SD          | Parmeliaceae | 1 | Melanohalea     | 56 |
| Melanohalea_trabeculata             | Parmeliaceae | 1 | Melanohalea     | 56 |
| Melanohalea_aff_olivacea            | Parmeliaceae | 1 | Melanohalea     | 57 |
| Melanohalea_gomukhensis_SD          | Parmeliaceae | 1 | Melanohalea     | 57 |
| Melanohalea_halei_SD                | Parmeliaceae | 1 | Melanohalea     | 57 |
| Melanohalea_infumata_SD             | Parmeliaceae | 1 | Melanohalea     | 57 |
| Melanohalea_olivacea                | Parmeliaceae | 1 | Melanohalea     | 57 |
| Melanohalea_olivacea_SD             | Parmeliaceae | 1 | Melanohalea     | 57 |
| Melanohalea_olivaceoides_SD         | Parmeliaceae | 1 | Melanohalea     | 57 |
| Melanohalea_septentrionalis_SD      | Parmeliaceae | 1 | Melanohalea     | 57 |
| Melanohalea_subelegantula           | Parmeliaceae | 1 | Melanohalea     | 57 |
| Melanohalea_ushuaiensis_SD          | Parmeliaceae | 1 | Melanohalea     | 58 |
| Menegazzia_chrysogaster_TROM_L48003 | Parmeliaceae | 1 | Menegazzia      | 59 |
| Menegazzia_confusa_HO558312         | Parmeliaceae | 1 | Menegazzia      | 59 |
| Menegazzia_elongata_HO559273        | Parmeliaceae | 1 | Menegazzia      | 59 |
| Menegazzia_kawesqarica_TROM_L48031  | Parmeliaceae | 1 | Menegazzia      | 59 |
| Menegazzia_myriotrema               | Parmeliaceae | 1 | Menegazzia      | 59 |
| Menegazzia_subbullata_HO559272      | Parmeliaceae | 1 | Menegazzia      | 59 |
| Menegazzia_subpertusa_TROM_L45455   | Parmeliaceae | 1 | Menegazzia      | 59 |
| Menegazzia_terebrata_IKT_10003      | Parmeliaceae | 1 | Menegazzia      | 59 |
| Menegazzia_violascens_TROM_L45316   | Parmeliaceae | 1 | Menegazzia      | 59 |
| Montanelia_disjuncta                | Parmeliaceae | 1 | Montanelia      | 62 |
| Montanelia_panniformis1             | Parmeliaceae | 1 | Montanelia      | 62 |
| Montanelia_panniformis3             | Parmeliaceae | 1 | Montanelia      | 62 |
| Montanelia_sorediata                | Parmeliaceae | 1 | Montanelia      | 62 |
| Montanelia_tominii                  | Parmeliaceae | 1 | Montanelia      | 62 |
| Myelochroa_aurulenta                | Parmeliaceae | 1 | Myelochroa      | 65 |
| Myelochroa_irrugans                 | Parmeliaceae | 1 | Myelochroa      | 65 |
| Myelochroa_metarevoluta             | Parmeliaceae | 1 | Myelochroa      | 65 |
| Nipponoparmelia_laevior             | Parmeliaceae | 1 | Nipponoparmelia | 66 |
| Nipponoparmelia_ricasolioides       | Parmeliaceae | 1 | Nipponoparmelia | 66 |
| Nodobryoria_abbreviata_II01         | Parmeliaceae | 1 | Nodobryoria     | 67 |
| Notoparmelia_crambidiocarpa         | Parmeliaceae | 1 | Notoparmelia    | 68 |
| Notoparmelia_cunninghamii           | Parmeliaceae | 1 | Notoparmelia    | 68 |
| Notoparmelia_signifera              | Parmeliaceae | 1 | Notoparmelia    | 68 |
| Notoparmelia_subtestacea            | Parmeliaceae | 1 | Notoparmelia    | 68 |
| Notoparmelia_tenuirima              | Parmeliaceae | 1 | Notoparmelia    | 68 |
| Omphalodium_pisacomense             | Parmeliaceae | 1 | Omphalodium     | 69 |
| Oropogon_atranorinus_4036           | Parmeliaceae | 1 | Oropogon        | 70 |
| Oropogon_evernicus_4032             | Parmeliaceae | 1 | Oropogon        | 70 |
| Oropogon_fumosus_cr1                | Parmeliaceae | 1 | Oropogon        | 70 |
| Oropogon_loxensis_cr2               | Parmeliaceae | 1 | Oropogon        | 70 |
| Oropogon_sp1_cr10                   | Parmeliaceae | 1 | Oropogon        | 70 |
| Oropogon_sperlingii_4072            | Parmeliaceae | 1 | Oropogon        | 70 |
| Oropogon_striatulus_cr7             | Parmeliaceae | 1 | Oropogon        | 70 |

|                                         |              |   |                |    |
|-----------------------------------------|--------------|---|----------------|----|
| Pannoparmelia_angustata_MWE145          | Parmeliaceae | 1 | Pannoparmelia  | 71 |
| Pannoparmelia_wilsonii2109              | Parmeliaceae | 1 | Pannoparmelia  | 71 |
| Parmelia_barrenoae                      | Parmeliaceae | 1 | Parmelia       | 72 |
| Parmelia_discordans                     | Parmeliaceae | 1 | Parmelia       | 72 |
| Parmelia_saxatilis                      | Parmeliaceae | 1 | Parmelia       | 72 |
| Parmelia_serrana                        | Parmeliaceae | 1 | Parmelia       | 72 |
| Parmelia_squarrosa                      | Parmeliaceae | 1 | Parmelia       | 72 |
| Parmelia_sulcata2                       | Parmeliaceae | 1 | Parmelia       | 72 |
| Parmelina_carporrhizans                 | Parmeliaceae | 1 | Parmelina      | 73 |
| Parmelina_pastillifera                  | Parmeliaceae | 1 | Parmelina      | 73 |
| Parmelina_quercina1                     | Parmeliaceae | 1 | Parmelina      | 73 |
| Parmelina_tiliacea                      | Parmeliaceae | 1 | Parmelina      | 73 |
| Parmelinella_wallichiana                | Parmeliaceae | 1 | Parmelinella   | 74 |
| Parmeliopsis_ambigua                    | Parmeliaceae | 1 | Parmeliopsis   | 75 |
| Parmeliopsis_hyperopta                  | Parmeliaceae | 1 | Parmeliopsis   | 75 |
| Parmotrema_cetratum                     | Parmeliaceae | 1 | Parmotrema     | 76 |
| Parmotrema_crinitum                     | Parmeliaceae | 1 | Parmotrema     | 76 |
| Parmotrema_fistulatum                   | Parmeliaceae | 1 | Parmotrema     | 76 |
| Parmotrema_haitiense                    | Parmeliaceae | 1 | Parmotrema     | 76 |
| Parmotrema_hypoleucinum                 | Parmeliaceae | 1 | Parmotrema     | 76 |
| Parmotrema_norsticticatum               | Parmeliaceae | 1 | Parmotrema     | 76 |
| Parmotrema_perforatum                   | Parmeliaceae | 1 | Parmotrema     | 76 |
| Parmotrema_perlatum                     | Parmeliaceae | 1 | Parmotrema     | 76 |
| Parmotrema_pilosum                      | Parmeliaceae | 1 | Parmotrema     | 76 |
| Parmotrema_reticulatum1                 | Parmeliaceae | 1 | Parmotrema     | 76 |
| Phacopsis_huuskonenii_HL361S2           | Parmeliaceae | 1 | Phacopsis      | 77 |
| Protousnea_magellanica_MWE157           | Parmeliaceae | 1 | Protousnea     | 77 |
| Protousnea_sp_2271                      | Parmeliaceae | 1 | Protousnea     | 77 |
| Protousnea_sp_2274                      | Parmeliaceae | 1 | Protousnea     | 77 |
| Platismatia_glauca                      | Parmeliaceae | 1 | Platismatia    | 78 |
| Platismatia_norvegica                   | Parmeliaceae | 1 | Platismatia    | 78 |
| Platismatia_tuckermanii2229             | Parmeliaceae | 1 | Platismatia    | 78 |
| Protoparmelia_badiaA_71474_003          | Parmeliaceae | 1 | Protoparmelia  | 80 |
| Protoparmelia_badiaB1_SD_2              | Parmeliaceae | 1 | Protoparmelia  | 80 |
| Protoparmelia_badiaC_19437_BA140185     | Parmeliaceae | 1 | Protoparmelia  | 80 |
| Protoparmelia_hypotremella_14305A_HY318 | Parmeliaceae | 1 | Protoparmelia  | 80 |
| Protoparmelia_memnonia_9612_ME037       | Parmeliaceae | 1 | Protoparmelia  | 80 |
| Protoparmelia_montagneiA_19465_MO310    | Parmeliaceae | 1 | Protoparmelia  | 80 |
| Protoparmelia_montagneiB_19459_MO306    | Parmeliaceae | 1 | Protoparmelia  | 80 |
| Protoparmelia_montagneiC_19427_MO140175 | Parmeliaceae | 1 | Protoparmelia  | 80 |
| Protoparmelia_oleagina_10816_OL283      | Parmeliaceae | 1 | Protoparmelia  | 80 |
| Protoparmelia_picea                     | Parmeliaceae | 1 | Protoparmelia  | 80 |
| Protoparmelia_capitata_55885_CA323      | Parmeliaceae | 1 | Protoparmelia  | 81 |
| Protoparmelia_corallifera_6984_CO299    | Parmeliaceae | 1 | Protoparmelia  | 81 |
| Protoparmelia_orientalis_6922_OR296     | Parmeliaceae | 1 | Protoparmelia  | 84 |
| Protoparmelia_pulchra_37097_PU064       | Parmeliaceae | 1 | Protoparmelia  | 84 |
| Pseudephebe_pubescens                   | Parmeliaceae | 1 | Pseudephebe    | 85 |
| Pseudoparmelia_cyphellata_8609          | Parmeliaceae | 1 | Pseudoparmelia | 86 |
| Pseudoparmelia_floridensisKS3           | Parmeliaceae | 1 | Pseudoparmelia | 86 |
| Pseudoparmelia_uleana8706               | Parmeliaceae | 1 | Pseudoparmelia | 86 |
| Psiloparmelia_denotata                  | Parmeliaceae | 1 | Psiloparmelia  | 87 |
| Psiloparmelia_sp                        | Parmeliaceae | 1 | Psiloparmelia  | 87 |
| Relicina_subnigra                       | Parmeliaceae | 1 | Relicina       | 93 |
| Relicina_sydneyensis                    | Parmeliaceae | 1 | Relicina       | 93 |
| Relicinopsis_intertexta_1083            | Parmeliaceae | 1 | Relicinopsis   | 94 |
| Relicinopsis_rahengensis_1084           | Parmeliaceae | 1 | Relicinopsis   | 94 |
| Relicinopsis_stevensii_1073             | Parmeliaceae | 1 | Relicinopsis   | 94 |
| Remototrachyna_ciliata                  | Parmeliaceae | 1 | Remototrachyna | 95 |
| Remototrachyna_costaricensis            | Parmeliaceae | 1 | Remototrachyna | 95 |

|                                    |                |   |                |     |
|------------------------------------|----------------|---|----------------|-----|
| Remototrachyna_flexilis            | Parmeliaceae   | 1 | Remototrachyna | 95  |
| Remototrachyna_incognita1          | Parmeliaceae   | 1 | Remototrachyna | 95  |
| Remototrachyna_infirma2            | Parmeliaceae   | 1 | Remototrachyna | 95  |
| Remototrachyna_scytophylla1        | Parmeliaceae   | 1 | Remototrachyna | 95  |
| Sulcaria_sulcata                   | Parmeliaceae   | 1 | Sulcaria       | 101 |
| Sulcaria_virens                    | Parmeliaceae   | 1 | Sulcaria       | 101 |
| Usnea_antarctica                   | Parmeliaceae   | 1 | Usnea          | 103 |
| Usnea_articulata_ART_02            | Parmeliaceae   | 1 | Usnea          | 103 |
| Usnea_cornuta_cor42FRST            | Parmeliaceae   | 1 | Usnea          | 103 |
| Usnea_filipendula_YO6771           | Parmeliaceae   | 1 | Usnea          | 103 |
| Usnea_florida                      | Parmeliaceae   | 1 | Usnea          | 103 |
| Usnea_fragilescens_fra96BO         | Parmeliaceae   | 1 | Usnea          | 103 |
| Usnea_fulvoreaegens_LAP_04         | Parmeliaceae   | 1 | Usnea          | 103 |
| Usnea_glabrata_gla113CHS           | Parmeliaceae   | 1 | Usnea          | 103 |
| Usnea_glabrescens_GLA_17           | Parmeliaceae   | 1 | Usnea          | 103 |
| Usnea_hirta_HIR_01                 | Parmeliaceae   | 1 | Usnea          | 103 |
| Usnea_mutabilis_YO4407             | Parmeliaceae   | 1 | Usnea          | 103 |
| Usnea_rubicunda                    | Parmeliaceae   | 1 | Usnea          | 103 |
| Usnea_sphacelata                   | Parmeliaceae   | 1 | Usnea          | 103 |
| Usnea_subaranea123                 | Parmeliaceae   | 1 | Usnea          | 103 |
| Usnea_subfloridana                 | Parmeliaceae   | 1 | Usnea          | 103 |
| Usnea_trachycarpa                  | Parmeliaceae   | 1 | Usnea          | 103 |
| Usnea_wasmuthii_SUB_03             | Parmeliaceae   | 1 | Usnea          | 103 |
| Usnea_pectinata_YO4373             | Parmeliaceae   | 1 | Usnea          | 104 |
| Usnea_trichodeoides_YO5316         | Parmeliaceae   | 1 | Usnea          | 105 |
| Xanthoparmelia_azaiensis           | Parmeliaceae   | 1 | Xanthoparmelia | 106 |
| Xanthoparmelia_brachinaensis       | Parmeliaceae   | 1 | Xanthoparmelia | 106 |
| Xanthoparmelia_chlorochroa_536     | Parmeliaceae   | 1 | Xanthoparmelia | 106 |
| Xanthoparmelia_consersa            | Parmeliaceae   | 1 | Xanthoparmelia | 106 |
| Xanthoparmelia_crespoae1           | Parmeliaceae   | 1 | Xanthoparmelia | 106 |
| Xanthoparmelia_cumberlandia_nybg02 | Parmeliaceae   | 1 | Xanthoparmelia | 106 |
| Xanthoparmelia_dierythra_6510      | Parmeliaceae   | 1 | Xanthoparmelia | 106 |
| Xanthoparmelia_exornata            | Parmeliaceae   | 1 | Xanthoparmelia | 106 |
| Xanthoparmelia_hottentota          | Parmeliaceae   | 1 | Xanthoparmelia | 106 |
| Xanthoparmelia_isidiovagans        | Parmeliaceae   | 1 | Xanthoparmelia | 106 |
| Xanthoparmelia_loxodes1            | Parmeliaceae   | 1 | Xanthoparmelia | 106 |
| Xanthoparmelia_mougeotii2          | Parmeliaceae   | 1 | Xanthoparmelia | 106 |
| Xanthoparmelia_pokornyii2          | Parmeliaceae   | 1 | Xanthoparmelia | 106 |
| Xanthoparmelia_protomatrae         | Parmeliaceae   | 1 | Xanthoparmelia | 106 |
| Xanthoparmelia_saxetii_538         | Parmeliaceae   | 1 | Xanthoparmelia | 106 |
| Xanthoparmelia_semiviridis         | Parmeliaceae   | 1 | Xanthoparmelia | 106 |
| Xanthoparmelia_stenophylla         | Parmeliaceae   | 1 | Xanthoparmelia | 106 |
| Xanthoparmelia_subdiffluens        | Parmeliaceae   | 1 | Xanthoparmelia | 106 |
| Xanthoparmelia_tinctina1           | Parmeliaceae   | 1 | Xanthoparmelia | 106 |
| Xanthoparmelia_vicentei1           | Parmeliaceae   | 1 | Xanthoparmelia | 106 |
| Xanthoparmelia_wyomingica_826      | Parmeliaceae   | 1 | Xanthoparmelia | 106 |
| Cladia_aggregata                   | Cladoniaceae   | 2 | Cladia         | 17  |
| Cladia_dumicola                    | Cladoniaceae   | 2 | Cladia         | 17  |
| Cladia_schizopora                  | Cladoniaceae   | 2 | Cladia         | 17  |
| Cladonia_caroliniana               | Cladoniaceae   | 2 | Cladonia       | 18  |
| Cladonia_stipitata                 | Cladoniaceae   | 2 | Cladonia       | 18  |
| Cladonia_sulcata                   | Cladoniaceae   | 2 | Cladonia       | 18  |
| Cladonia_rangiferina               | Cladoniaceae   | 2 | Cladina        | 19  |
| Metus_conglomeratus                | Cladoniaceae   | 2 | Metus          | 60  |
| Pycnothelia_papillaria             | Cladoniaceae   | 2 | Pycnothelia    | 88  |
| Gypsoplaca_macrophylla             | Gypsoplacaceae | 3 | Gyposoplaca    | 30  |
| Lecanora_achroa0                   | Lecanoraceae   | 4 | Lecanora       | 36  |
| Lecanora_flavopallida0             | Lecanoraceae   | 4 | Lecanora       | 38  |
| Lecanora_tropica2                  | Lecanoraceae   | 4 | Lecanora       | 42  |

|                                     |                  |    |                   |     |
|-------------------------------------|------------------|----|-------------------|-----|
| Lecidella_patavina0                 | Lecanoraceae     | 4  | Lecidella         | 47  |
| Lecidella_stigmatea1                | Lecanoraceae     | 4  | Lecidella         | 47  |
| Lecanora_carpinea                   | Lecanoraceae     | 5  | Lecanorella       | 37  |
| Lecanora_hybocarpa                  | Lecanoraceae     | 5  | Lecanorella       | 40  |
| Lecanora_paramerae                  | Lecanoraceae     | 5  | Lecanorella       | 40  |
| Lecanora_sulphurea                  | Lecanoraceae     | 5  | Lecanorella       | 41  |
| Lecanora_garovaglii0                | Lecanoraceae     | 6  | Protoparmeliopsis | 39  |
| Lecanora_muralis2                   | Lecanoraceae     | 6  | Protoparmeliopsis | 39  |
| Rhizoplaca_peltata2                 | Lecanoraceae     | 6  | Protoparmeliopsis | 39  |
| Rhizoplaca_chrysoleuca1             | Lecanoraceae     | 6  | Rhizoplaca        | 96  |
| Rhizoplaca_haydenii                 | Lecanoraceae     | 6  | Rhizoplaca        | 97  |
| Rhizoplaca_porterii                 | Lecanoraceae     | 6  | Rhizoplaca        | 97  |
| Lecidea_floridensis                 | Lecideaceae      | 7  | Lecideaxx         | 43  |
| Lecidea_sp1                         | Lecideaceae      | 7  | Lecideaxx         | 46  |
| Lecidea_nylanderii                  | Lecideaceae      | 8  | Lecidea           | 44  |
| Lecidea_roseotincta                 | Lecideaceae      | 8  | Lecidea           | 45  |
| Lepraria_bergensis                  | Stereocaulaceae  | 9  | Leprariella       | 48  |
| Lepraria_lobificans                 | Stereocaulaceae  | 9  | Lepraria          | 49  |
| Stereocaulon_paschale               | Stereocaulaceae  | 9  | Stereocaulon      | 100 |
| Stereocaulon_tomentosum             | Stereocaulaceae  | 9  | Stereocaulon      | 100 |
| Miriquidica_complanata              | Miriquidicaceae  | 10 | Miriquidica       | 61  |
| Miriquidica_garovagli               | Miriquidicaceae  | 10 | Miriquidica       | 61  |
| Miriquidica_leucophaea              | Miriquidicaceae  | 10 | Miriquidica       | 61  |
| Protoparmelia_atriseda_26046_007    | Miriquidicaceae  | 10 | Miriquidica       | 79  |
| Protoparmelia_cupreobadiaA_8631_028 | Miriquidicaceae  | 10 | Miriquidica       | 79  |
| Protoparmelia_phaeonesos_13365_082  | Miriquidicaceae  | 10 | Miriquidica       | 79  |
| Protoparmelia_leproloma_3046_012    | Miriquidicaceae  | 10 | Miriquidica       | 82  |
| Protoparmelia_nephaea_120032        | Miriquidicaceae  | 10 | Miriquidica       | 83  |
| Mycoblastus_affinis                 | Tephromelataceae | 11 | Mycoblastus       | 63  |
| Mycoblastus_sanguinarius            | Tephromelataceae | 11 | Mycoblastellus    | 64  |
| Tephromela_atra                     | Tephromelataceae | 11 | Tephromela        | 102 |
| Pyrrhosporea_laeta36817             | Ramboldiaceae    | 12 | Ramboldia         | 89  |
| Pyrrhosporea_sanguinolenta          | Ramboldiaceae    | 12 | Ramboldia         | 90  |
| Ramboldia_sanguinolenta             | Ramboldiaceae    | 12 | Ramboldia         | 90  |
| Ramboldia_brunneocarpa              | Ramboldiaceae    | 12 | Ramboldia         | 91  |
| Ramboldia_startii28664              | Ramboldiaceae    | 12 | Ramboldia         | 92  |
| Squamarina_cartilaginea             | Squamarinaceae   | 13 | Squamarina        | 98  |
| Squamarina_lentigera                | Squamarinaceae   | 13 | Squamarina        | 98  |
| Squamarina_gypsacea                 | Squamarinaceae   | 13 | Squamarina        | 99  |



|                                 | OldFam       | NewFam | OldGen                | NewGen |
|---------------------------------|--------------|--------|-----------------------|--------|
| Ahtiana_pallidula               | Parmeliaceae |        | 1 Ahtiana             | 1      |
| Allocetraria_ambigua            | Parmeliaceae |        | 1 Allocetraria        | 1      |
| Allocetraria_flavonigrescens    | Parmeliaceae |        | 1 Allocetraria        | 1      |
| Allocetraria_globulans          | Parmeliaceae |        | 1 Allocetraria        | 1      |
| Allocetraria_stracheyi_AST_02   | Parmeliaceae |        | 1 Allocetraria        | 1      |
| Arctocetraria_andrejewii        | Parmeliaceae |        | 1 Arctocetraria       | 1      |
| Arctocetraria_nigriscens        | Parmeliaceae |        | 1 Arctocetraria       | 1      |
| Cetraria_islandica              | Parmeliaceae |        | 1 Cetraria            | 1      |
| Cetraria_laevigata              | Parmeliaceae |        | 1 Cetraria            | 1      |
| Cetraria_muricata               | Parmeliaceae |        | 1 Cetraria            | 1      |
| Cetraria_nigricans              | Parmeliaceae |        | 1 Cetraria            | 1      |
| Cetraria_odontella              | Parmeliaceae |        | 1 Cetraria            | 1      |
| Cetraria_sepincola_CSE_01       | Parmeliaceae |        | 1 Cetraria            | 1      |
| Cetrariella_delisei             | Parmeliaceae |        | 1 Cetrariella         | 1      |
| Cetrariella_fastigiata          | Parmeliaceae |        | 1 Cetrariella         | 1      |
| Cetrariella_fastigiata_CFA_02   | Parmeliaceae |        | 1 Cetrariella         | 1      |
| Cetrellopsis_rhytidocarpa       | Parmeliaceae |        | 1 Cetrellopsis        | 1      |
| Flavocetraria_cucullata         | Parmeliaceae |        | 1 Flavocetraria       | 1      |
| Flavocetraria_nivalis           | Parmeliaceae |        | 1 Flavocetrariella    | 1      |
| Kaernefeltia_merrillii          | Parmeliaceae |        | 1 Kaernefeltia        | 1      |
| Masonhalea_inermis_551a         | Parmeliaceae |        | 1 Masonhalea          | 1      |
| Masonhalea_richardsonii         | Parmeliaceae |        | 1 Masonhalea          | 1      |
| Melanelia_commixta              | Parmeliaceae |        | 1 Melanelicetraria    | 1      |
| Melanelia_sorediella            | Parmeliaceae |        | 1 Melanelicetraria    | 1      |
| Melanelia_culbersonii_3992      | Parmeliaceae |        | 1 Melaneliculbersonia | 1      |
| Cetraria_obtusata               | Parmeliaceae |        | 1 Neocetraria         | 1      |
| Nephromopsis_komarovii          | Parmeliaceae |        | 1 Nephromopsis        | 1      |
| Nephromopsis_laureri            | Parmeliaceae |        | 1 Nephromopsis        | 1      |
| Nephromopsis_leucostigma        | Parmeliaceae |        | 1 Nephromopsis        | 1      |
| Nephromopsis_nephromoides       | Parmeliaceae |        | 1 Nephromopsis        | 1      |
| Nephromopsis_pallescens         | Parmeliaceae |        | 1 Nephromopsis        | 1      |
| Tuckermanella_coralligera       | Parmeliaceae |        | 1 Tuckermanella       | 1      |
| Tuckermanella_fendleri          | Parmeliaceae |        | 1 Tuckermanella       | 1      |
| Tuckermannopsis_chlorophylla    | Parmeliaceae |        | 1 Tuckermannopsis     | 1      |
| Tuckermannopsis_ciliaris        | Parmeliaceae |        | 1 Tuckermannopsis     | 1      |
| Tuckermannopsis_orbata          | Parmeliaceae |        | 1 Tuckermannopsis     | 1      |
| Usnocetraria_oakesiana          | Parmeliaceae |        | 1 Usnocetraria        | 1      |
| Vulpicida_canadensis_CAN_15     | Parmeliaceae |        | 1 Vulpicida           | 1      |
| Vulpicida_juniperinus_JUN_07    | Parmeliaceae |        | 1 Vulpicida           | 1      |
| Vulpicida_pinastri              | Parmeliaceae |        | 1 Vulpicida           | 1      |
| Vulpicida_tubulosus_JUN_14      | Parmeliaceae |        | 1 Vulpicida           | 1      |
| Vulpicida_viridis_VIR_10        | Parmeliaceae |        | 1 Vulpicida           | 1      |
| Alectoria_arctica_S146          | Parmeliaceae |        | 1 Alectoria           | 2      |
| Alectoria_nigricans             | Parmeliaceae |        | 1 Alectoria           | 2      |
| Alectoria_ochroleuca            | Parmeliaceae |        | 1 Alectoria           | 2      |
| Alectoria_sarmentosa            | Parmeliaceae |        | 1 Alectoria           | 2      |
| Allantoparmelia_almquistii_5158 | Parmeliaceae |        | 1 Allantoparmelia     | 3      |
| Allantoparmelia_alpicola        | Parmeliaceae |        | 1 Allantoparmelia     | 3      |
| Anzia_colpodes                  | Parmeliaceae |        | 1 Anzia               | 4      |
| Anzia_flavotenuis               | Parmeliaceae |        | 1 Anzia               | 5      |
| Anzia_mahaeliyensis             | Parmeliaceae |        | 1 Anzia               | 5      |
| Arctoparmelia_centrifuga        | Parmeliaceae |        | 1 Arctoparmelia       | 6      |
| Arctoparmelia_incurva_MWE10     | Parmeliaceae |        | 1 Arctoparmelia       | 6      |
| Austroparmelina_endoleuca2      | Parmeliaceae |        | 1 Austroparmelina     | 7      |
| Austroparmelina_macrospora      | Parmeliaceae |        | 1 Austroparmelina     | 7      |
| Austroparmelina_pruinata        | Parmeliaceae |        | 1 Austroparmelina     | 7      |
| Austroparmelina_pseudorelicina  | Parmeliaceae |        | 1 Austroparmelina     | 7      |
| Brodoa_atrofusca                | Parmeliaceae |        | 1 Brodoa              | 8      |

|                                  |              |   |                |    |
|----------------------------------|--------------|---|----------------|----|
| Brodoa_intestiniformis           | Parmeliaceae | 1 | Brodoa         | 8  |
| Brodoa_oroarctica                | Parmeliaceae | 1 | Brodoa         | 8  |
| Hypogymnia_bitteri30678          | Parmeliaceae | 1 | Hypogymnia     | 8  |
| Hypogymnia_hultenii2             | Parmeliaceae | 1 | Hypogymnia     | 8  |
| Hypogymnia_imshaugii1            | Parmeliaceae | 1 | Hypogymnia     | 8  |
| Hypogymnia_imshaugii2            | Parmeliaceae | 1 | Hypogymnia     | 8  |
| Hypogymnia_lophyrea2             | Parmeliaceae | 1 | Hypogymnia     | 8  |
| Hypogymnia_lugubris3014          | Parmeliaceae | 1 | Hypogymnia     | 8  |
| Hypogymnia_mollisD79             | Parmeliaceae | 1 | Hypogymnia     | 8  |
| Hypogymnia_mundata3013           | Parmeliaceae | 1 | Hypogymnia     | 8  |
| Hypogymnia_physodes              | Parmeliaceae | 1 | Hypogymnia     | 8  |
| Hypogymnia_pulverata_2277        | Parmeliaceae | 1 | Hypogymnia     | 8  |
| Hypogymnia_pulverata_2281        | Parmeliaceae | 1 | Hypogymnia     | 8  |
| Hypogymnia_rugosa3822            | Parmeliaceae | 1 | Hypogymnia     | 8  |
| Hypogymnia_subphysodes_2280      | Parmeliaceae | 1 | Hypogymnia     | 8  |
| Hypogymnia_tasmanica3012         | Parmeliaceae | 1 | Hypogymnia     | 8  |
| Hypogymnia_vittata               | Parmeliaceae | 1 | Hypogymnia     | 8  |
| Pseudevernia_consocians          | Parmeliaceae | 1 | Pseudevernia   | 8  |
| Pseudevernia_furfuracea          | Parmeliaceae | 1 | Pseudevernia   | 8  |
| Bryocaulon_divergens_MWE158      | Parmeliaceae | 1 | Bryocaulon     | 9  |
| Bryocaulon_pseudosatoanum_YO8239 | Parmeliaceae | 1 | Bryocaulon     | 9  |
| Bryocaulon_satoanumMWE163        | Parmeliaceae | 1 | Bryocaulon     | 9  |
| Bryoria_americana_S329           | Parmeliaceae | 1 | Bryoria        | 10 |
| Bryoria_bicolor_L156             | Parmeliaceae | 1 | Bryoria        | 10 |
| Bryoria_capillaris               | Parmeliaceae | 1 | Bryoria        | 10 |
| Bryoria_fremontii                | Parmeliaceae | 1 | Bryoria        | 10 |
| Bryoria_furcellata_L147          | Parmeliaceae | 1 | Bryoria        | 10 |
| Bryoria_fuscescens_S56           | Parmeliaceae | 1 | Bryoria        | 10 |
| Bryoria_glabra_L186              | Parmeliaceae | 1 | Bryoria        | 10 |
| Bryoria_implexa_L244a            | Parmeliaceae | 1 | Bryoria        | 10 |
| Bryoria_nadvornikiana_S79        | Parmeliaceae | 1 | Bryoria        | 10 |
| Bryoria_simplicior_S30b          | Parmeliaceae | 1 | Bryoria        | 10 |
| Bryoria_smithii_S65              | Parmeliaceae | 1 | Bryoria        | 10 |
| Bryoria_trichodes                | Parmeliaceae | 1 | Bryoria        | 10 |
| Bulbothrix_apophysata            | Parmeliaceae | 1 | Bulbothricella | 11 |
| Bulbothrix_coronata              | Parmeliaceae | 1 | Bulbothricella | 11 |
| Bulbothrix_decurtata             | Parmeliaceae | 1 | Bulbothrix     | 12 |
| Bulbothrix_isidiza1              | Parmeliaceae | 1 | Bulbothrix     | 12 |
| Bulbothrix_isidiza2              | Parmeliaceae | 1 | Bulbothrix     | 12 |
| Bulbothrix_meizospora            | Parmeliaceae | 1 | Bulbothrix     | 12 |
| Bulbothrix_meizospora2           | Parmeliaceae | 1 | Bulbothrix     | 12 |
| Bulbothrix_sensibilis            | Parmeliaceae | 1 | Bulbothrix     | 12 |
| Bulbothrix_setschwanensis        | Parmeliaceae | 1 | Bulbothrix     | 12 |
| Bulbothrix_tabacina              | Parmeliaceae | 1 | Bulbothrix     | 12 |
| Canoparmelia_carneopruinata      | Parmeliaceae | 1 | Crespoa        | 13 |
| Nesolechia_oxyspora_16840        | Parmeliaceae | 1 | Nesolechia     | 13 |
| Punctelia_aff_bolliana           | Parmeliaceae | 1 | Punctelia      | 13 |
| Punctelia_borreri2               | Parmeliaceae | 1 | Punctelia      | 13 |
| Punctelia_pseudocoralloidea      | Parmeliaceae | 1 | Punctelia      | 13 |
| Punctelia_reddenda               | Parmeliaceae | 1 | Punctelia      | 13 |
| Punctelia_rudecta                | Parmeliaceae | 1 | Punctelia      | 13 |
| Punctelia_subflava               | Parmeliaceae | 1 | Punctelia      | 13 |
| Punctelia_subrudecta3            | Parmeliaceae | 1 | Punctelia      | 13 |
| Punctelia_ullophylla             | Parmeliaceae | 1 | Punctelia      | 13 |
| Canoparmelia_caroliniana         | Parmeliaceae | 1 | Canoparmelia   | 14 |
| Canoparmelia_nairobiensis        | Parmeliaceae | 1 | Canoparmelia   | 14 |
| Canoparmelia_inhaminensis        | Parmeliaceae | 1 | Crespoa        | 14 |
| Canoparmelia_schelpi             | Parmeliaceae | 1 | Crespoa        | 14 |
| Canoparmelia_concrescens         | Parmeliaceae | 1 | Canoparmelia   | 15 |

|                                 |              |   |                |    |
|---------------------------------|--------------|---|----------------|----|
| Canoparmelia_texana             | Parmeliaceae | 1 | Canoparmelia   | 15 |
| Canoparmelia_crozalsiana        | Parmeliaceae | 1 | Crespoa        | 15 |
| Canoparmelia_Punctelia_sp       | Parmeliaceae | 1 | Newgenus       | 15 |
| Cetrelia_cetrarioides           | Parmeliaceae | 1 | Cetrelia       | 16 |
| Cetrelia_olivetorum             | Parmeliaceae | 1 | Cetrelia       | 16 |
| Cetrelia_pseudolivetorum        | Parmeliaceae | 1 | Cetrelia       | 16 |
| Coelopogon_abraxus_4253         | Parmeliaceae | 1 | Coelopogon     | 20 |
| Coelopogon_epiphorellus_4254    | Parmeliaceae | 1 | Coelopogon     | 20 |
| Coelopogon_epiphorellus_MWE156  | Parmeliaceae | 1 | Coelopogon     | 20 |
| Cornicularia_normoerica         | Parmeliaceae | 1 | Cornicularia   | 21 |
| Dactylina_arctica_4855          | Parmeliaceae | 1 | Dactylina      | 22 |
| Dactylina_ramulosa_4902         | Parmeliaceae | 1 | Dactylina      | 22 |
| Emodomelanelia_masonii          | Parmeliaceae | 1 | Emodomelanelia | 23 |
| Esslingeriana_idahoensis_4823   | Parmeliaceae | 1 | Esslingeriana  | 24 |
| Melanelia_hepatizon             | Parmeliaceae | 1 | Melanelia      | 24 |
| Melanelia_stygia                | Parmeliaceae | 1 | Melanelia      | 24 |
| Evernia_divaricata              | Parmeliaceae | 1 | Evernia        | 25 |
| Evernia_mesomorpha              | Parmeliaceae | 1 | Evernia        | 25 |
| Evernia_prunastri               | Parmeliaceae | 1 | Evernia        | 25 |
| Everniopsis_trulla              | Parmeliaceae | 1 | Everniopsis    | 26 |
| Everniopsis_trulla_5706         | Parmeliaceae | 1 | Everniopsis    | 26 |
| Flavoparmelia_baltimorensis     | Parmeliaceae | 1 | Flavoparmelia  | 27 |
| Flavoparmelia_caperata2         | Parmeliaceae | 1 | Flavoparmelia  | 27 |
| Flavoparmelia_haysomii          | Parmeliaceae | 1 | Flavoparmelia  | 27 |
| Flavoparmelia_marchantii        | Parmeliaceae | 1 | Flavoparmelia  | 27 |
| Flavoparmelia_soredians2        | Parmeliaceae | 1 | Flavoparmelia  | 27 |
| Flavoparmelia_springtonensis    | Parmeliaceae | 1 | Flavoparmelia  | 27 |
| Flavoparmelia_subambigua        | Parmeliaceae | 1 | Flavoparmelia  | 27 |
| Flavoparmelia_citrinescens      | Parmeliaceae | 1 | Flavoparmelia  | 28 |
| Flavopunctelia_flaventior       | Parmeliaceae | 1 | Flavopunctelia | 29 |
| Flavopunctelia_soredica         | Parmeliaceae | 1 | Flavopunctelia | 29 |
| Hypotrachyna_cirrhatta          | Parmeliaceae | 1 | Hypotrachyna   | 31 |
| Hypotrachyna_dubitans           | Parmeliaceae | 1 | Hypotrachyna   | 31 |
| Hypotrachyna_kaernefeltii       | Parmeliaceae | 1 | Hypotrachyna   | 31 |
| Hypotrachyna_lipidifera         | Parmeliaceae | 1 | Hypotrachyna   | 31 |
| Hypotrachyna_nepalensis         | Parmeliaceae | 1 | Hypotrachyna   | 31 |
| Hypotrachyna_sorocheila         | Parmeliaceae | 1 | Hypotrachyna   | 31 |
| Hypotrachyna_endochloraMAF10379 | Parmeliaceae | 1 | Hypotrachyna   | 32 |
| Hypotrachyna_imbricatula        | Parmeliaceae | 1 | Hypotrachyna   | 32 |
| Hypotrachyna_physcioides1       | Parmeliaceae | 1 | Hypotrachyna   | 32 |
| Hypotrachyna_neodissecta2       | Parmeliaceae | 1 | Hypotrachyna   | 33 |
| Hypotrachyna_polydactyla        | Parmeliaceae | 1 | Hypotrachyna   | 33 |
| Hypotrachyna_pseudosinuosa      | Parmeliaceae | 1 | Hypotrachyna   | 33 |
| Hypotrachyna_revoluta           | Parmeliaceae | 1 | Hypotrachyna   | 33 |
| Parmelinopsis_afrorevoluta      | Parmeliaceae | 1 | Hypotrachyna   | 33 |
| Parmelinopsis_horrescens2       | Parmeliaceae | 1 | Hypotrachyna   | 33 |
| Parmelinopsis_minarum           | Parmeliaceae | 1 | Hypotrachyna   | 33 |
| Parmelinopsis_neodamaziana      | Parmeliaceae | 1 | Hypotrachyna   | 33 |
| Parmelinopsis_subfaticens       | Parmeliaceae | 1 | Hypotrachyna   | 33 |
| Hypotrachyna_sinuosa            | Parmeliaceae | 1 | Hypotrachyna   | 34 |
| Imshaugia_aleurites             | Parmeliaceae | 1 | Imshaugia      | 35 |
| Letharia_columbiana             | Parmeliaceae | 1 | Letharia       | 50 |
| Lethariella_cashmeriana         | Parmeliaceae | 1 | Letharia       | 50 |
| Lethariella_togashii_YO6735     | Parmeliaceae | 1 | Lethariella    | 51 |
| Melanelixia_albertana           | Parmeliaceae | 1 | Melanelixia    | 52 |
| Melanelixia_californica1        | Parmeliaceae | 1 | Melanelixia    | 52 |
| Melanelixia_californica3        | Parmeliaceae | 1 | Melanelixia    | 52 |
| Melanelixia_glabra1             | Parmeliaceae | 1 | Melanelixia    | 52 |
| Melanelixia_subargentifera2     | Parmeliaceae | 1 | Melanelixia    | 52 |

|                                     |              |   |                 |    |
|-------------------------------------|--------------|---|-----------------|----|
| Melanelixia_villosella2             | Parmeliaceae | 1 | Melanelixia     | 52 |
| Melanelixia_fuliginosa              | Parmeliaceae | 1 | Melanelixia     | 53 |
| Melanelixia_subaurifera3            | Parmeliaceae | 1 | Melanelixia     | 53 |
| Melanelixia_glabratuloides          | Parmeliaceae | 1 | Melanelixia     | 54 |
| Melanelixia_pilliferella            | Parmeliaceae | 1 | Melanelixia     | 54 |
| Melanelixia_subglabra               | Parmeliaceae | 1 | Melanelixia     | 55 |
| Melanohalea_aff_exasperata3         | Parmeliaceae | 1 | Melanohalea     | 56 |
| Melanohalea_elegantula_SD           | Parmeliaceae | 1 | Melanohalea     | 56 |
| Melanohalea_exasperata_SD           | Parmeliaceae | 1 | Melanohalea     | 56 |
| Melanohalea_exasperata2             | Parmeliaceae | 1 | Melanohalea     | 56 |
| Melanohalea_exasperatula_SD         | Parmeliaceae | 1 | Melanohalea     | 56 |
| Melanohalea_laciniatula3            | Parmeliaceae | 1 | Melanohalea     | 56 |
| Melanohalea_laciniatula4            | Parmeliaceae | 1 | Melanohalea     | 56 |
| Melanohalea_multispora_SD           | Parmeliaceae | 1 | Melanohalea     | 56 |
| Melanohalea_subolivacea_SD          | Parmeliaceae | 1 | Melanohalea     | 56 |
| Melanohalea_trabeculata             | Parmeliaceae | 1 | Melanohalea     | 56 |
| Melanohalea_aff_olivacea            | Parmeliaceae | 1 | Melanohalea     | 57 |
| Melanohalea_gomukhensis_SD          | Parmeliaceae | 1 | Melanohalea     | 57 |
| Melanohalea_halei_SD                | Parmeliaceae | 1 | Melanohalea     | 57 |
| Melanohalea_infumata_SD             | Parmeliaceae | 1 | Melanohalea     | 57 |
| Melanohalea_olivacea                | Parmeliaceae | 1 | Melanohalea     | 57 |
| Melanohalea_olivacea_SD             | Parmeliaceae | 1 | Melanohalea     | 57 |
| Melanohalea_olivaceoides_SD         | Parmeliaceae | 1 | Melanohalea     | 57 |
| Melanohalea_septentrionalis_SD      | Parmeliaceae | 1 | Melanohalea     | 57 |
| Melanohalea_subelegantula           | Parmeliaceae | 1 | Melanohalea     | 57 |
| Melanohalea_ushuaiensis_SD          | Parmeliaceae | 1 | Melanohalea     | 58 |
| Menegazzia_chrysogaster_TROM_L48003 | Parmeliaceae | 1 | Menegazzia      | 59 |
| Menegazzia_confusa_HO558312         | Parmeliaceae | 1 | Menegazzia      | 59 |
| Menegazzia_elongata_HO559273        | Parmeliaceae | 1 | Menegazzia      | 59 |
| Menegazzia_kawesqarica_TROM_L48031  | Parmeliaceae | 1 | Menegazzia      | 59 |
| Menegazzia_myriotrema               | Parmeliaceae | 1 | Menegazzia      | 59 |
| Menegazzia_subbullata_HO559272      | Parmeliaceae | 1 | Menegazzia      | 59 |
| Menegazzia_subpertusa_TROM_L45455   | Parmeliaceae | 1 | Menegazzia      | 59 |
| Menegazzia_terebrata_IKT_10003      | Parmeliaceae | 1 | Menegazzia      | 59 |
| Menegazzia_violascens_TROM_L45316   | Parmeliaceae | 1 | Menegazzia      | 59 |
| Montanelia_disjuncta                | Parmeliaceae | 1 | Montanelia      | 62 |
| Montanelia_panniformis1             | Parmeliaceae | 1 | Montanelia      | 62 |
| Montanelia_panniformis3             | Parmeliaceae | 1 | Montanelia      | 62 |
| Montanelia_sorediata                | Parmeliaceae | 1 | Montanelia      | 62 |
| Montanelia_tominii                  | Parmeliaceae | 1 | Montanelia      | 62 |
| Myelochroa_aurulenta                | Parmeliaceae | 1 | Myelochroa      | 65 |
| Myelochroa_irrugans                 | Parmeliaceae | 1 | Myelochroa      | 65 |
| Myelochroa_metarevoluta             | Parmeliaceae | 1 | Myelochroa      | 65 |
| Nipponoparmelia_laevior             | Parmeliaceae | 1 | Nipponoparmelia | 66 |
| Nipponoparmelia_ricasolioides       | Parmeliaceae | 1 | Nipponoparmelia | 66 |
| Nodobryoria_abbreviata_II01         | Parmeliaceae | 1 | Nodobryoria     | 67 |
| Notoparmelia_crambidiocarpa         | Parmeliaceae | 1 | Notoparmelia    | 68 |
| Notoparmelia_cunninghamii           | Parmeliaceae | 1 | Notoparmelia    | 68 |
| Notoparmelia_signifera              | Parmeliaceae | 1 | Notoparmelia    | 68 |
| Notoparmelia_subtestacea            | Parmeliaceae | 1 | Notoparmelia    | 68 |
| Notoparmelia_tenuirima              | Parmeliaceae | 1 | Notoparmelia    | 68 |
| Omphalodium_pisacomense             | Parmeliaceae | 1 | Omphalodium     | 69 |
| Oropogon_atranorinus_4036           | Parmeliaceae | 1 | Oropogon        | 70 |
| Oropogon_evernicus_4032             | Parmeliaceae | 1 | Oropogon        | 70 |
| Oropogon_fumosus_cr1                | Parmeliaceae | 1 | Oropogon        | 70 |
| Oropogon_loxensis_cr2               | Parmeliaceae | 1 | Oropogon        | 70 |
| Oropogon_sp1_cr10                   | Parmeliaceae | 1 | Oropogon        | 70 |
| Oropogon_sperlingii_4072            | Parmeliaceae | 1 | Oropogon        | 70 |
| Oropogon_striatulus_cr7             | Parmeliaceae | 1 | Oropogon        | 70 |

|                                         |              |   |                |    |
|-----------------------------------------|--------------|---|----------------|----|
| Pannoparmelia_angustata_MWE145          | Parmeliaceae | 1 | Pannoparmelia  | 71 |
| Pannoparmelia_wilsonii2109              | Parmeliaceae | 1 | Pannoparmelia  | 71 |
| Parmelia_barrenoae                      | Parmeliaceae | 1 | Parmelia       | 72 |
| Parmelia_discordans                     | Parmeliaceae | 1 | Parmelia       | 72 |
| Parmelia_saxatilis                      | Parmeliaceae | 1 | Parmelia       | 72 |
| Parmelia_serrana                        | Parmeliaceae | 1 | Parmelia       | 72 |
| Parmelia_squarrosa                      | Parmeliaceae | 1 | Parmelia       | 72 |
| Parmelia_sulcata2                       | Parmeliaceae | 1 | Parmelia       | 72 |
| Parmelina_carporrhizans                 | Parmeliaceae | 1 | Parmelina      | 73 |
| Parmelina_pastillifera                  | Parmeliaceae | 1 | Parmelina      | 73 |
| Parmelina_quercina1                     | Parmeliaceae | 1 | Parmelina      | 73 |
| Parmelina_tiliacea                      | Parmeliaceae | 1 | Parmelina      | 73 |
| Parmelinella_wallichiana                | Parmeliaceae | 1 | Parmelinella   | 74 |
| Parmeliopsis_ambigua                    | Parmeliaceae | 1 | Parmeliopsis   | 75 |
| Parmeliopsis_hyperopta                  | Parmeliaceae | 1 | Parmeliopsis   | 75 |
| Parmotrema_cetratum                     | Parmeliaceae | 1 | Parmotrema     | 76 |
| Parmotrema_crinitum                     | Parmeliaceae | 1 | Parmotrema     | 76 |
| Parmotrema_fistulatum                   | Parmeliaceae | 1 | Parmotrema     | 76 |
| Parmotrema_haitiense                    | Parmeliaceae | 1 | Parmotrema     | 76 |
| Parmotrema_hypoleucinum                 | Parmeliaceae | 1 | Parmotrema     | 76 |
| Parmotrema_norsticticatum               | Parmeliaceae | 1 | Parmotrema     | 76 |
| Parmotrema_perforatum                   | Parmeliaceae | 1 | Parmotrema     | 76 |
| Parmotrema_perlatum                     | Parmeliaceae | 1 | Parmotrema     | 76 |
| Parmotrema_pilosum                      | Parmeliaceae | 1 | Parmotrema     | 76 |
| Parmotrema_reticulatum1                 | Parmeliaceae | 1 | Parmotrema     | 76 |
| Phacopsis_huuskonenii_HL361S2           | Parmeliaceae | 1 | Phacopsis      | 77 |
| Protousnea_magellanica_MWE157           | Parmeliaceae | 1 | Protousnea     | 77 |
| Protousnea_sp_2271                      | Parmeliaceae | 1 | Protousnea     | 77 |
| Protousnea_sp_2274                      | Parmeliaceae | 1 | Protousnea     | 77 |
| Platismatia_glauca                      | Parmeliaceae | 1 | Platismatia    | 78 |
| Platismatia_norvegica                   | Parmeliaceae | 1 | Platismatia    | 78 |
| Platismatia_tuckermanii2229             | Parmeliaceae | 1 | Platismatia    | 78 |
| Protoparmelia_badiaA_71474_003          | Parmeliaceae | 1 | Protoparmelia  | 80 |
| Protoparmelia_badiaB1_SD_2              | Parmeliaceae | 1 | Protoparmelia  | 80 |
| Protoparmelia_badiaC_19437_BA140185     | Parmeliaceae | 1 | Protoparmelia  | 80 |
| Protoparmelia_hypotremella_14305A_HY318 | Parmeliaceae | 1 | Protoparmelia  | 80 |
| Protoparmelia_memnonia_9612_ME037       | Parmeliaceae | 1 | Protoparmelia  | 80 |
| Protoparmelia_montagneiA_19465_MO310    | Parmeliaceae | 1 | Protoparmelia  | 80 |
| Protoparmelia_montagneiB_19459_MO306    | Parmeliaceae | 1 | Protoparmelia  | 80 |
| Protoparmelia_montagneiC_19427_MO140175 | Parmeliaceae | 1 | Protoparmelia  | 80 |
| Protoparmelia_oleagina_10816_OL283      | Parmeliaceae | 1 | Protoparmelia  | 80 |
| Protoparmelia_picea                     | Parmeliaceae | 1 | Protoparmelia  | 80 |
| Protoparmelia_capitata_55885_CA323      | Parmeliaceae | 1 | Protoparmelia  | 81 |
| Protoparmelia_corallifera_6984_CO299    | Parmeliaceae | 1 | Protoparmelia  | 81 |
| Protoparmelia_orientalis_6922_OR296     | Parmeliaceae | 1 | Protoparmelia  | 84 |
| Protoparmelia_pulchra_37097_PU064       | Parmeliaceae | 1 | Protoparmelia  | 84 |
| Pseudephebe_pubescens                   | Parmeliaceae | 1 | Pseudephebe    | 85 |
| Pseudoparmelia_cyphellata_8609          | Parmeliaceae | 1 | Pseudoparmelia | 86 |
| Pseudoparmelia_floridensisKS3           | Parmeliaceae | 1 | Pseudoparmelia | 86 |
| Pseudoparmelia_uleana8706               | Parmeliaceae | 1 | Pseudoparmelia | 86 |
| Psiloparmelia_denotata                  | Parmeliaceae | 1 | Psiloparmelia  | 87 |
| Psiloparmelia_sp                        | Parmeliaceae | 1 | Psiloparmelia  | 87 |
| Relicina_subnigra                       | Parmeliaceae | 1 | Relicina       | 93 |
| Relicina_sydneyensis                    | Parmeliaceae | 1 | Relicina       | 93 |
| Relicinopsis_intertexta_1083            | Parmeliaceae | 1 | Relicinopsis   | 94 |
| Relicinopsis_rahengensis_1084           | Parmeliaceae | 1 | Relicinopsis   | 94 |
| Relicinopsis_stevensii_1073             | Parmeliaceae | 1 | Relicinopsis   | 94 |
| Remototrachyna_ciliata                  | Parmeliaceae | 1 | Remototrachyna | 95 |
| Remototrachyna_costaricensis            | Parmeliaceae | 1 | Remototrachyna | 95 |

|                                    |                |   |                |     |
|------------------------------------|----------------|---|----------------|-----|
| Remototrachyna_flexilis            | Parmeliaceae   | 1 | Remototrachyna | 95  |
| Remototrachyna_incognita1          | Parmeliaceae   | 1 | Remototrachyna | 95  |
| Remototrachyna_infirma2            | Parmeliaceae   | 1 | Remototrachyna | 95  |
| Remototrachyna_scytophylla1        | Parmeliaceae   | 1 | Remototrachyna | 95  |
| Sulcaria_sulcata                   | Parmeliaceae   | 1 | Sulcaria       | 101 |
| Sulcaria_virens                    | Parmeliaceae   | 1 | Sulcaria       | 101 |
| Usnea_antarctica                   | Parmeliaceae   | 1 | Usnea          | 103 |
| Usnea_articulata_ART_02            | Parmeliaceae   | 1 | Usnea          | 103 |
| Usnea_cornuta_cor42FRST            | Parmeliaceae   | 1 | Usnea          | 103 |
| Usnea_filipendula_YO6771           | Parmeliaceae   | 1 | Usnea          | 103 |
| Usnea_florida                      | Parmeliaceae   | 1 | Usnea          | 103 |
| Usnea_fragilescens_fra96BO         | Parmeliaceae   | 1 | Usnea          | 103 |
| Usnea_fulvovirens_LAP_04           | Parmeliaceae   | 1 | Usnea          | 103 |
| Usnea_glabrata_gla113CHS           | Parmeliaceae   | 1 | Usnea          | 103 |
| Usnea_glabrescens_GLA_17           | Parmeliaceae   | 1 | Usnea          | 103 |
| Usnea_hirta_HIR_01                 | Parmeliaceae   | 1 | Usnea          | 103 |
| Usnea_mutabilis_YO4407             | Parmeliaceae   | 1 | Usnea          | 103 |
| Usnea_rubicunda                    | Parmeliaceae   | 1 | Usnea          | 103 |
| Usnea_sphacelata                   | Parmeliaceae   | 1 | Usnea          | 103 |
| Usnea_subaranea123                 | Parmeliaceae   | 1 | Usnea          | 103 |
| Usnea_subfloridana                 | Parmeliaceae   | 1 | Usnea          | 103 |
| Usnea_trachycarpa                  | Parmeliaceae   | 1 | Usnea          | 103 |
| Usnea_wasmuthii_SUB_03             | Parmeliaceae   | 1 | Usnea          | 103 |
| Usnea_pectinata_YO4373             | Parmeliaceae   | 1 | Usnea          | 104 |
| Usnea_trichodeoides_YO5316         | Parmeliaceae   | 1 | Usnea          | 105 |
| Xanthoparmelia_azaiensis           | Parmeliaceae   | 1 | Xanthoparmelia | 106 |
| Xanthoparmelia_brachinaensis       | Parmeliaceae   | 1 | Xanthoparmelia | 106 |
| Xanthoparmelia_chlorochroa_536     | Parmeliaceae   | 1 | Xanthoparmelia | 106 |
| Xanthoparmelia_consersa            | Parmeliaceae   | 1 | Xanthoparmelia | 106 |
| Xanthoparmelia_crespoae1           | Parmeliaceae   | 1 | Xanthoparmelia | 106 |
| Xanthoparmelia_cumberlandia_nybg02 | Parmeliaceae   | 1 | Xanthoparmelia | 106 |
| Xanthoparmelia_dierythra_6510      | Parmeliaceae   | 1 | Xanthoparmelia | 106 |
| Xanthoparmelia_exornata            | Parmeliaceae   | 1 | Xanthoparmelia | 106 |
| Xanthoparmelia_hottentota          | Parmeliaceae   | 1 | Xanthoparmelia | 106 |
| Xanthoparmelia_isidiavagans        | Parmeliaceae   | 1 | Xanthoparmelia | 106 |
| Xanthoparmelia_loxodes1            | Parmeliaceae   | 1 | Xanthoparmelia | 106 |
| Xanthoparmelia_mougeotii2          | Parmeliaceae   | 1 | Xanthoparmelia | 106 |
| Xanthoparmelia_pokornyii2          | Parmeliaceae   | 1 | Xanthoparmelia | 106 |
| Xanthoparmelia_protomatrae         | Parmeliaceae   | 1 | Xanthoparmelia | 106 |
| Xanthoparmelia_saxetii_538         | Parmeliaceae   | 1 | Xanthoparmelia | 106 |
| Xanthoparmelia_semiviridis         | Parmeliaceae   | 1 | Xanthoparmelia | 106 |
| Xanthoparmelia_stenophylla         | Parmeliaceae   | 1 | Xanthoparmelia | 106 |
| Xanthoparmelia_subdiffluens        | Parmeliaceae   | 1 | Xanthoparmelia | 106 |
| Xanthoparmelia_tinctina1           | Parmeliaceae   | 1 | Xanthoparmelia | 106 |
| Xanthoparmelia_vicentei1           | Parmeliaceae   | 1 | Xanthoparmelia | 106 |
| Xanthoparmelia_wyomingica_826      | Parmeliaceae   | 1 | Xanthoparmelia | 106 |
| Cladia_aggregata                   | Cladoniaceae   | 2 | Cladia         | 17  |
| Cladia_dumicola                    | Cladoniaceae   | 2 | Cladia         | 17  |
| Cladia_schizopora                  | Cladoniaceae   | 2 | Cladia         | 17  |
| Cladonia_caroliniana               | Cladoniaceae   | 2 | Cladonia       | 18  |
| Cladonia_stipitata                 | Cladoniaceae   | 2 | Cladonia       | 18  |
| Cladonia_sulcata                   | Cladoniaceae   | 2 | Cladonia       | 18  |
| Cladonia_rangiferina               | Cladoniaceae   | 2 | Cladonia       | 19  |
| Metus_conglomeratus                | Cladoniaceae   | 2 | Metus          | 60  |
| Pycnothelia_papillaria             | Cladoniaceae   | 2 | Pycnothelia    | 88  |
| Gypsoplaca_macrophylla             | Gypsoplacaceae | 3 | Gypsoplaca     | 30  |
| Lecanora_achroa0                   | Lecanoraceae   | 4 | Lecanora       | 36  |
| Lecanora_flavopallida0             | Lecanoraceae   | 4 | Lecanora       | 38  |
| Lecanora_tropica2                  | Lecanoraceae   | 4 | Lecanora       | 42  |

|                                     |                  |    |                   |     |
|-------------------------------------|------------------|----|-------------------|-----|
| Lecidella_pativina0                 | Lecanoraceae     | 4  | Lecidella         | 47  |
| Lecidella_stigmatea1                | Lecanoraceae     | 4  | Lecidella         | 47  |
| Lecanora_carpinea                   | Lecanoraceae     | 5  | Lecanorella       | 37  |
| Lecanora_hybocarpa                  | Lecanoraceae     | 5  | Lecanorella       | 40  |
| Lecanora_paramerae                  | Lecanoraceae     | 5  | Lecanorella       | 40  |
| Lecanora_sulphurea                  | Lecanoraceae     | 5  | Lecanorella       | 41  |
| Lecanora_garovaglii0                | Lecanoraceae     | 6  | Protoparmeliopsis | 39  |
| Lecanora_muralis2                   | Lecanoraceae     | 6  | Protoparmeliopsis | 39  |
| Rhizoplaca_peltata2                 | Lecanoraceae     | 6  | Protoparmeliopsis | 39  |
| Rhizoplaca_chrysoleuca1             | Lecanoraceae     | 6  | Rhizoplaca        | 96  |
| Rhizoplaca_haydenii                 | Lecanoraceae     | 6  | Rhizoplaca        | 97  |
| Rhizoplaca_porterii                 | Lecanoraceae     | 6  | Rhizoplaca        | 97  |
| Lecidea_floridensis                 | Lecideaceae      | 7  | Lecideaxx         | 43  |
| Lecidea_sp1                         | Lecideaceae      | 7  | Lecideaxx         | 46  |
| Lecidea_nylanderii                  | Lecideaceae      | 8  | Lecidea           | 44  |
| Lecidea_roseotincta                 | Lecideaceae      | 8  | Lecidea           | 45  |
| Lepraria_bergensis                  | Stereocaulaceae  | 9  | Leprariella       | 48  |
| Lepraria_lobificans                 | Stereocaulaceae  | 9  | Lepraria          | 49  |
| Stereocaulon_paschale               | Stereocaulaceae  | 9  | Stereocaulon      | 100 |
| Stereocaulon_tomentosum             | Stereocaulaceae  | 9  | Stereocaulon      | 100 |
| Miriquidica_complanata              | Miriquidicaceae  | 10 | Miriquidica       | 61  |
| Miriquidica_garovagli               | Miriquidicaceae  | 10 | Miriquidica       | 61  |
| Miriquidica_leucophaea              | Miriquidicaceae  | 10 | Miriquidica       | 61  |
| Protoparmelia_atriseda_26046_007    | Miriquidicaceae  | 10 | Miriquidica       | 79  |
| Protoparmelia_cupreobadiaA_8631_028 | Miriquidicaceae  | 10 | Miriquidica       | 79  |
| Protoparmelia_phaeonesos_13365_082  | Miriquidicaceae  | 10 | Miriquidica       | 79  |
| Protoparmelia_leproloma_3046_012    | Miriquidicaceae  | 10 | Miriquidica       | 82  |
| Protoparmelia_nephaea_120032        | Miriquidicaceae  | 10 | Miriquidica       | 83  |
| Mycoblastus_affinis                 | Tephromelataceae | 11 | Mycoblastus       | 63  |
| Mycoblastus_sanguinarius            | Tephromelataceae | 11 | Mycoblastellus    | 64  |
| Tephromela_atra                     | Tephromelataceae | 11 | Tephromela        | 102 |
| Pyrrhosporea_laeta36817             | Ramboldiaceae    | 12 | Ramboldia         | 89  |
| Pyrrhosporea_sanguinolenta          | Ramboldiaceae    | 12 | Ramboldia         | 90  |
| Ramboldia_sanguinolenta             | Ramboldiaceae    | 12 | Ramboldia         | 90  |
| Ramboldia_brunneocarpa              | Ramboldiaceae    | 12 | Ramboldia         | 91  |
| Ramboldia_startii28664              | Ramboldiaceae    | 12 | Ramboldia         | 92  |
| Squamarina_cartilaginea             | Squamarinaceae   | 13 | Squamarina        | 98  |
| Squamarina_lentigera                | Squamarinaceae   | 13 | Squamarina        | 98  |
| Squamarina_gypsacea                 | Squamarinaceae   | 13 | Squamarina        | 99  |
